# Supplementary material for: A semantics, energy-based approach to automate biomodel composition
Source: PubMed Central journal article supplement (PMC9165793; doi:10.1371/journal.pone.0269497), 2022-06-03
Supplement: pone.0269497.s003.pdf [file pone.0269497.s003.pdf]

**S1 Table. Reactant(s) and product(s) of each step in EGFR pathway and the reaction rate equations.**

Steps 4, 8, and 16 are irreversible reactions, which are approximated by mass action kinetics.  $\kappa_i$  ( $i \in \{Step\}$ ) in the reaction rate equations represent the reaction rate constants,  $K_x$  ( $x \in \{Reactant(s), Product(s)\}$ ) is the thermodynamic constant of each species, and  $q_x$  ( $x \in \{Reactant(s), Product(s)\}$ ) is the concentration amount of each species.

| Step | Reactant(s)             |                         | Product(s)              |                         |          | Reaction rate equation (law of mass action)                                                                                                                           |
|------|-------------------------|-------------------------|-------------------------|-------------------------|----------|-----------------------------------------------------------------------------------------------------------------------------------------------------------------------|
| 1    | <i>EGF</i>              | <i>EGFR</i>             | <i>EGF:EGFR complex</i> | ---                     | ---      | $\kappa_1(K_{EGFR} \cdot q_{EGFR} \cdot K_{EGF} \cdot q_{EGF} - K_{(EGF:EGFR)} \cdot q_{(EGF:EGFR)})$                                                                 |
| 2    | <i>EGF:EGFR complex</i> | <i>EGF:EGFR complex</i> | <i>R<sub>2</sub></i>    | ---                     | ---      | $\kappa_2(K^2_{(EGF:EGFR)} \cdot q^2_{(EGF:EGFR)} - K_{R_2} \cdot q_{R_2})$                                                                                           |
| 3    | <i>R<sub>2</sub></i>    | ---                     | <i>RP</i>               | ---                     | ---      | $\kappa_3(K_{R_2} \cdot q_{R_2} - K_{RP} \cdot q_{RP})$                                                                                                               |
| 4    | <i>RP</i>               | <i>ATP</i>              | <i>R<sub>2</sub></i>    | <i>ADP</i>              | <i>P</i> | $\kappa_4(K_{RP} \cdot q_{RP} \cdot K_{ATP} \cdot q_{ATP} - K_{R_2} \cdot q_{R_2} \cdot K_{ADP} \cdot q_{ADP} \cdot K_P \cdot q_P)$                                   |
| 5    | <i>RP</i>               | <i>PLC<sub>γ</sub></i>  | <i>RPL</i>              | ---                     | ---      | $\kappa_5(K_{RP} \cdot q_{RP} \cdot K_{PLC_\gamma} \cdot q_{PLC_\gamma} - K_{RPL} \cdot q_{RPL})$                                                                     |
| 6    | <i>RPL</i>              | ---                     | <i>RPLP</i>             | ---                     | ---      | $\kappa_6(K_{RPL} \cdot q_{RPL} - K_{RPLP} \cdot q_{RPLP})$                                                                                                           |
| 7    | <i>RPLP</i>             | ---                     | <i>RP</i>               | <i>PLC<sub>γ</sub>P</i> | ---      | $\kappa_7(K_{RPLP} \cdot q_{RPLP} - K_{RP} \cdot q_{RP} \cdot K_{PLC_\gamma P} \cdot q_{PLC_\gamma P})$                                                               |
| 8    | <i>PLC<sub>γ</sub>P</i> | <i>ATP</i>              | <i>PLC<sub>γ</sub></i>  | <i>ADP</i>              | <i>P</i> | $\kappa_8(K_{PLC_\gamma P} \cdot q_{PLC_\gamma P} \cdot K_{ATP} \cdot q_{ATP} - K_{PLC_\gamma} \cdot q_{PLC_\gamma} \cdot K_{ADP} \cdot q_{ADP} \cdot K_P \cdot q_P)$ |
| 9    | <i>RP</i>               | <i>Grb</i>              | <i>RG</i>               | ---                     | ---      | $\kappa_9(K_{RP} \cdot q_{RP} \cdot K_{Grb} \cdot q_{Grb} - K_{RG} \cdot q_{RG})$                                                                                     |
| 10   | <i>RG</i>               | <i>SOS</i>              | <i>RGS</i>              | ---                     | ---      | $\kappa_{10}(K_{RG} \cdot q_{RG} \cdot K_{SOS} \cdot q_{SOS} - K_{RGS} \cdot q_{RGS})$                                                                                |
| 11   | <i>RGS</i>              | ---                     | <i>RP</i>               | <i>GS</i>               | ---      | $\kappa_{11}(K_{RGS} \cdot q_{RGS} - K_{RP} \cdot q_{RP} \cdot K_{GS} \cdot q_{GS})$                                                                                  |
| 12   | <i>GS</i>               | ---                     | <i>Grb</i>              | <i>SOS</i>              | ---      | $\kappa_{12}(K_{GS} \cdot q_{GS} - K_{Grb} \cdot q_{Grb} \cdot K_{SOS} \cdot q_{SOS})$                                                                                |
| 13   | <i>RP</i>               | <i>Shc</i>              | <i>RSh</i>              | ---                     | ---      | $\kappa_{13}(K_{RP} \cdot q_{RP} \cdot K_{Shc} \cdot q_{Shc} - K_{RSh} \cdot q_{RSh})$                                                                                |
| 14   | <i>RSh</i>              | ---                     | <i>RShP</i>             | ---                     | ---      | $\kappa_{14}(K_{RSh} \cdot q_{RSh} - K_{RShP} \cdot q_{RShP})$                                                                                                        |
| 15   | <i>RShP</i>             | ---                     | <i>RP</i>               | <i>ShP</i>              | ---      | $\kappa_{15}(K_{RShP} \cdot q_{RShP} - K_{RP} \cdot q_{RP} \cdot K_{ShP} \cdot q_{ShP})$                                                                              |
| 16   | <i>ShP</i>              | <i>ATP</i>              | <i>Shc</i>              | <i>ADP</i>              | <i>P</i> | $\kappa_{16}(K_{ShP} \cdot q_{ShP} \cdot K_{ATP} \cdot q_{ATP} - K_{Shc} \cdot q_{Shc} \cdot K_{ADP} \cdot q_{ADP} \cdot K_P \cdot q_P)$                              |
| 17   | <i>RShP</i>             | <i>Grb</i>              | <i>RShG</i>             | ---                     | ---      | $\kappa_{17}(K_{RShP} \cdot q_{RShP} \cdot K_{Grb} \cdot q_{Grb} - K_{RShG} \cdot q_{RShG})$                                                                          |
| 18   | <i>RShG</i>             | ---                     | <i>RP</i>               | <i>ShG</i>              | ---      | $\kappa_{18}(K_{RShG} \cdot q_{RShG} - K_{RP} \cdot q_{RP} \cdot K_{ShG} \cdot q_{ShG})$                                                                              |
| 19   | <i>RShG</i>             | <i>SOS</i>              | <i>RShGS</i>            | ---                     | ---      | $\kappa_{19}(K_{RShG} \cdot q_{RShG} \cdot K_{SOS} \cdot q_{SOS} - K_{RShGS} \cdot q_{RShGS})$                                                                        |
| 20   | <i>RShGS</i>            | ---                     | <i>ShGS</i>             | <i>RP</i>               | ---      | $\kappa_{20}(K_{RShGS} \cdot q_{RShGS} - K_{ShGS} \cdot q_{ShGS} \cdot K_{RP} \cdot q_{RP})$                                                                          |
| 21   | <i>ShP</i>              | <i>Grb</i>              | <i>ShG</i>              | ---                     | ---      | $\kappa_{21}(K_{ShP} \cdot q_{ShP} \cdot K_{Grb} \cdot q_{Grb} - K_{ShG} \cdot q_{ShG})$                                                                              |
| 22   | <i>ShG</i>              | <i>SOS</i>              | <i>ShGS</i>             | ---                     | ---      | $\kappa_{22}(K_{ShG} \cdot q_{ShG} \cdot K_{SOS} \cdot q_{SOS} - K_{ShGS} \cdot q_{ShGS})$                                                                            |
| 23   | <i>ShGS</i>             | ---                     | <i>ShP</i>              | <i>GS</i>               | ---      | $\kappa_{23}(K_{ShGS} \cdot q_{ShGS} - K_{ShP} \cdot q_{ShP} \cdot K_{GS} \cdot q_{GS})$                                                                              |
| 24   | <i>RShP</i>             | <i>GS</i>               | <i>RShGS</i>            | ---                     | ---      | $\kappa_{24}(K_{RShP} \cdot q_{RShP} \cdot K_{GS} \cdot q_{GS} - K_{RShGS} \cdot q_{RShGS})$                                                                          |
| 25   | <i>PLC<sub>γ</sub>P</i> | ---                     | <i>PLC<sub>γ</sub>I</i> | ---                     | ---      | $\kappa_{25}(K_{PLC_\gamma P} \cdot q_{PLC_\gamma P} - K_{PLC_\gamma I} \cdot q_{PLC_\gamma I})$                                                                      |
