# Supplementary material for: A semantics, energy-based approach to automate biomodel composition
Source: PubMed Central journal article supplement (PMC9165793; doi:10.1371/journal.pone.0269497), 2022-06-03
Supplement: pone.0269497.s004.pdf [file pone.0269497.s004.pdf]

**S2 Table. Kinetic and bond graph parameters of the species in the EGFR pathway model.**

| Species                 | Kholodenko et al. | Bond graph version |                 |
|-------------------------|-------------------|--------------------|-----------------|
|                         | $q_{(nM)}$        | $K_{(nM^{-1})}$    | $q_{(nM)}$      |
| <i>EGF</i>              | 680               | 0.00345            | 680             |
| <i>EGFR</i>             | 100               | 0.00345            | 100             |
| <i>EGF:EGFR complex</i> | 0                 | 0.00023            | 0               |
| <i>R<sub>2</sub></i>    | 0                 | 5.72797            | 0               |
| <i>RP</i>               | 0                 | 1.52491            | 0               |
| <i>RPL</i>              | 0                 | 7.00286            | 0               |
| <i>RPLP</i>             | 0                 | 932.16266          | 0               |
| <i>PLC<sub>γ</sub></i>  | 105               | 1.37768            | 105             |
| <i>PLC<sub>γ</sub>P</i> | 0                 | 12.22572           | 0               |
| <i>PLC<sub>γ</sub>I</i> | 0                 | 0.36677            | 0               |
| <i>RG</i>               | 0                 | 0.07026            | 0               |
| <i>RGS</i>              | 0                 | 0.07092            | 0               |
| <i>Grb</i>              | 85                | 0.00276            | 85              |
| <i>SOS</i>              | 34                | 0.16826            | 34              |
| <i>GS</i>               | 0                 | 0.00697            | 0               |
| <i>RSh</i>              | 0                 | 5.79765            | 0               |
| <i>RShP</i>             | 0                 | 154.34709          | 0               |
| <i>ShP</i>              | 0                 | 0.28005            | 0               |
| <i>ShG</i>              | 0                 | 0.02584            | 0               |
| <i>Shc</i>              | 150               | 5.70290            | 150             |
| <i>RShG</i>             | 0                 | 14.23610           | 0               |
| <i>ShGS</i>             | 0                 | 0.00856            | 0               |
| <i>RShGS</i>            | 0                 | 5.55987            | 0               |
| <i>ATP</i>              | --                | 266223.39715       | 10 <sup>3</sup> |
| <i>ADP</i>              | --                | 10 <sup>-3</sup>   | 10 <sup>3</sup> |
| <i>P</i>                | --                | 10 <sup>-3</sup>   | 10 <sup>3</sup> |
