# Supplementary material for: A semantics, energy-based approach to automate biomodel composition
Source: PubMed Central journal article supplement (PMC9165793; doi:10.1371/journal.pone.0269497), 2022-06-03
Supplement: pone.0269497.s005.pdf [file pone.0269497.s005.pdf]

S3 Table. Kinetic and bond graph parameters of the reactions in the EGFR pathway model.

| Reactions                        | Kholodenko et al. |                                 | Bond graph version          |
|----------------------------------|-------------------|---------------------------------|-----------------------------|
|                                  | $k^+$             | $k^-$                           | $K$ (nmol.s <sup>-1</sup> ) |
| <b>Re: <math>\kappa</math>1</b>  | 0.003             | 0.06                            | 250.69800                   |
| <b>Re: <math>\kappa</math>2</b>  | 0.01              | 0.1                             | 174581.91080                |
| <b>Re: <math>\kappa</math>3</b>  | 1                 | 0.01                            | 0.00655                     |
| <b>Re: <math>\kappa</math>5</b>  | 0.06              | 0.2                             | 2855.97575                  |
| <b>Re: <math>\kappa</math>6</b>  | 1                 | 0.05                            | 5.36387                     |
| <b>Re: <math>\kappa</math>7</b>  | 0.3               | 0.006                           | 0.00032                     |
| <b>Re: <math>\kappa</math>9</b>  | 0.003             | 0.05                            | 0.711571                    |
| <b>Re: <math>\kappa</math>10</b> | 0.01              | 0.06                            | 0.84593                     |
| <b>Re: <math>\kappa</math>11</b> | 0.03              | 4.5e-3                          | 0.42304                     |
| <b>Re: <math>\kappa</math>12</b> | 1.5e-3            | 1e-4                            | 0.21499                     |
| <b>Re: <math>\kappa</math>13</b> | 0.09              | 0.6                             | 10349.01515                 |
| <b>Re: <math>\kappa</math>14</b> | 6                 | 0.06                            | 0.00038                     |
| <b>Re: <math>\kappa</math>15</b> | 0.3               | 9e-4                            | 0.00202                     |
| <b>Re: <math>\kappa</math>17</b> | 0.003             | 0.1                             | 0.00702                     |
| <b>Re: <math>\kappa</math>18</b> | 0.3               | 9e-4                            | 0.02193                     |
| <b>Re: <math>\kappa</math>19</b> | 0.01              | 2.14e-2                         | 0.0040                      |
| <b>Re: <math>\kappa</math>20</b> | 0.12              | 2.4e-4                          | 0.01991                     |
| <b>Re: <math>\kappa</math>21</b> | 0.003             | 0.1                             | 3.87197                     |
| <b>Re: <math>\kappa</math>22</b> | 0.03              | 0.064                           | 7.17844                     |
| <b>Re: <math>\kappa</math>23</b> | 0.1               | 0.021                           | 11.2010                     |
| <b>Re: <math>\kappa</math>24</b> | 0.009             | 4.29e-2                         | 0.00803                     |
| <b>Re: <math>\kappa</math>25</b> | 1                 | 0.03                            | 0.08179                     |
|                                  | $K_m$ (nmolar)    | $V_m$ (nmolar.s <sup>-1</sup> ) |                             |
| <b>Re: <math>\kappa</math>4</b>  | 50                | 450                             | 5.52664                     |
| <b>Re: <math>\kappa</math>8</b>  | 100               | 1                               | 0.00078                     |
| <b>Re: <math>\kappa</math>16</b> | 340               | 1.7                             | 0.014539                    |
