# Supplementary material for: A semantics, energy-based approach to automate biomodel composition
Source: PubMed Central journal article supplement (PMC9165793; doi:10.1371/journal.pone.0269497), 2022-06-03
Supplement: pone.0269497.s006.pdf [file pone.0269497.s006.pdf]

**S4 Table. Reactant(s) and product(s) of each step in the Ras activation intermediate pathway and the reaction rate equations.**

Steps 2 and 4 are irreversible mass action reactions, which are approximated by reversible mass action kinetics.  $\kappa_i$  ( $i \in \{Step\}$ ) in the reaction rate equations represent the reaction rate constants,  $K_x$  ( $x \in \{Reactant(s), Product(s)\}$ ) is the thermodynamic constant of each species, and  $q_x$  ( $x \in \{Reactant(s), Product(s)\}$ ) is the concentration amount of each species.

| Step | Reactant(s)     |               | Product(s)      |               | Reaction rate equation (law of mass action)                                                                 |
|------|-----------------|---------------|-----------------|---------------|-------------------------------------------------------------------------------------------------------------|
| 1    | <i>RasGDP</i>   | <i>RShcGS</i> | <i>RasShcGS</i> | ---           | $\kappa_1(K_{RasGDP} \cdot q_{RasGDP} \cdot K_{RShcGS} \cdot q_{RShcGS} - K_{RasShcGS} \cdot q_{RasShcGS})$ |
| 2    | <i>RasRShGS</i> | ---           | <i>RasGTP</i>   | <i>RShGS</i>  | $\kappa_2(K_{RasRShGS} \cdot q_{RasRShGS} - K_{RasGTP} \cdot q_{RasGTP} \cdot K_{RShGS} \cdot q_{RShGS})$   |
| 3    | <i>RasGTP</i>   | <i>GAP</i>    | <i>RasGAP</i>   | ---           | $\kappa_3(K_{RasGTP} \cdot q_{RasGTP} \cdot K_{GAP} \cdot q_{GAP} - K_{RasGAP} \cdot q_{RasGAP})$           |
| 4    | <i>RasGAP</i>   | ---           | <i>GAP</i>      | <i>RasGDP</i> | $\kappa_4(K_{RasGAP} \cdot q_{RasGAP} - K_{GAP} \cdot q_{GAP} \cdot K_{RasGDP} \cdot q_{RasGDP})$           |
| 5    | <i>RasGTP</i>   | ---           | <i>Ras</i>      | ---           | $\kappa_5(K_{RasGTP} \cdot q_{RasGTP} - K_{Ras} \cdot q_{Ras})$                                             |
