# Supplementary material for: A semantics, energy-based approach to automate biomodel composition
Source: PubMed Central journal article supplement (PMC9165793; doi:10.1371/journal.pone.0269497), 2022-06-03
Supplement: pone.0269497.s007.pdf [file pone.0269497.s007.pdf]

**S5 Table. Kinetic and bond graph parameters of the species in the Ras activation intermediate pathway model.**

| Species         | Brightman & Fell             | Bond graph version  |                   |
|-----------------|------------------------------|---------------------|-------------------|
|                 | $q_{(\text{dimensionless})}$ | $K_{(\text{nM}^4)}$ | $q_{(\text{nM})}$ |
| <i>RShGS</i>    | 0                            | 0.13                | 0                 |
| <i>RasGDP</i>   | 19800                        | 0.13                | 1.98              |
| <i>RasRShGS</i> | 0                            | 10.47               | 0                 |
| <i>RasGTP</i>   | 200                          | 0.0064              | 2e-2              |
| <i>GAP</i>      | 15000                        | 0.553               | 1.5               |
| <i>RasGAP</i>   | 0                            | 42.72               | 0                 |
| <i>Ras</i>      | 0                            | 16.07               | 0                 |
