# Supplementary material for: A semantics, energy-based approach to automate biomodel composition
Source: PubMed Central journal article supplement (PMC9165793; doi:10.1371/journal.pone.0269497), 2022-06-03
Supplement: pone.0269497.s008.pdf [file pone.0269497.s008.pdf]

**S6 Table. Kinetic and bond graph parameters of the reactions in the Ras activation intermediate pathway model.**

| Reactions                              | Brightman & Fell |       | Bond graph version                    |
|----------------------------------------|------------------|-------|---------------------------------------|
|                                        | $k^+$            | $k^-$ | $\mathcal{K}$ (nmol.s <sup>-1</sup> ) |
| <b><i>Re: <math>\kappa</math>1</i></b> | 0.0163           | 10    | 0.95                                  |
| <b><i>Re: <math>\kappa</math>2</i></b> | 15               | ---   | 1.43                                  |
| <b><i>Re: <math>\kappa</math>3</i></b> | 0.005            | 60    | 1.4                                   |
| <b><i>Re: <math>\kappa</math>4</i></b> | 720              | ---   | 16.85                                 |
| <b><i>Re: <math>\kappa</math>5</i></b> | 0.0012           | 3     | 0.186                                 |
